# Supplementary material
Source: Royal Society of Chemistry journal article supplement (doi:10.1039/d6nr01499b)
Supplement: d6nr01499b1.pdf [file d6nr01499b1.pdf]

## Supporting Information

### Structure free: compositionally-informed machine learning for solid-state electrolytes design

Qian Zhao<sup>a\*</sup>, Zhihua Li<sup>a</sup>, Yurong Ren<sup>a\*</sup>, Lin Shi<sup>b</sup>, Shoukun Xu<sup>b\*</sup>

<sup>a</sup> *School of Materials Science and Engineering, Jiangsu Province Engineering Research Center of Intelligent Manufacturing Technology for the New Energy Vehicle Power Battery, Changzhou University, Changzhou 213164, China*

<sup>b</sup> *School of Computer Science and Artificial Intelligence, Changzhou University, Changzhou 213164, China*

\*Email: [qzhao@cczu.edu.cn](mailto:qzhao@cczu.edu.cn) (Qian Zhao); [ryrchem@cczu.edu.cn](mailto:ryrchem@cczu.edu.cn) (Yurong Ren); [xsk@cczu.edu.cn](mailto:xsk@cczu.edu.cn) (Shoukun Xu)

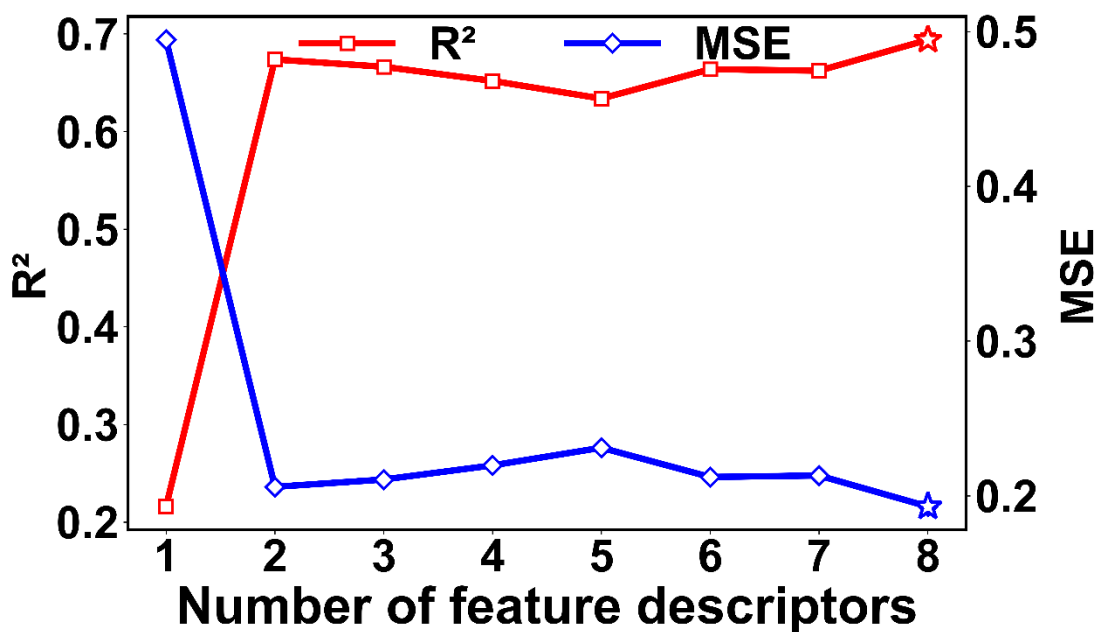

Figure S1. Impact of feature number on  $R^2$  and mean squared error ( $MSE$ ) in gradient boosting regression (XGBoost) models for halides.

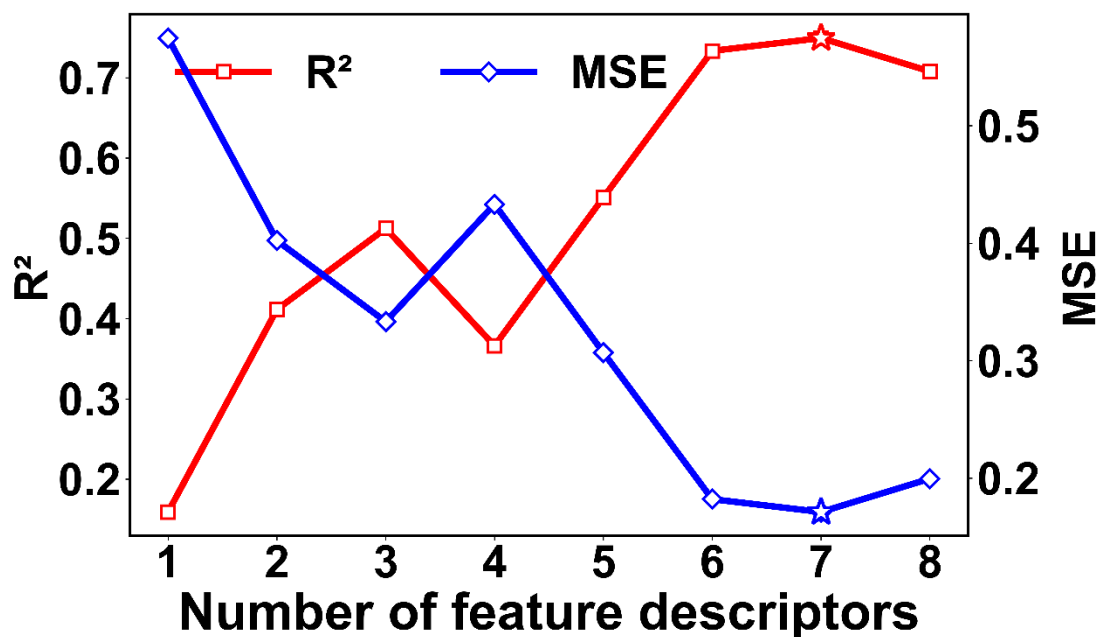

Figure S2. Impact of feature number on  $R^2$  and mean squared error ( $MSE$ ) in gradient boosting regression (XGBoost) models for ternary halides.

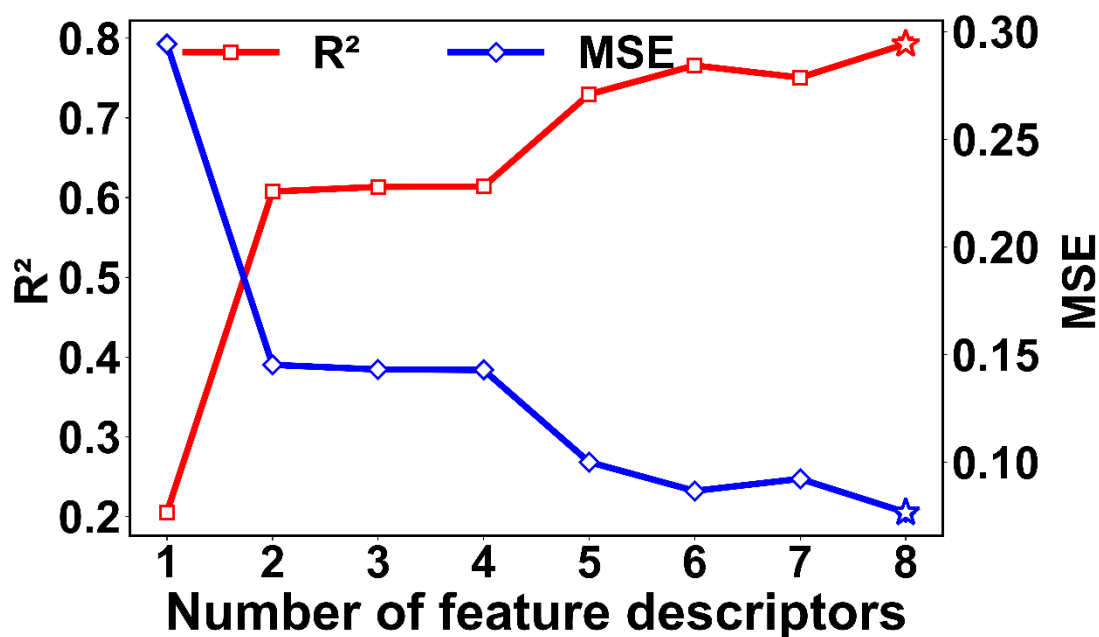

Figure S3. Impact of feature number on  $R^2$  and mean squared error ( $MSE$ ) in gradient boosting regression (XGBoost) models for quaternary halides.

Table S1 Complete list of 87 halide compounds used in this study, including chemical formula, room-temperature ionic conductivity ( $\sigma_{RT}$ ) measured by electrochemical impedance spectroscopy (EIS), and corresponding literature source.

| <b>No.</b> | <b>Formula</b>                                        | <b><math>\sigma_{RT}</math> (ms/cm)</b> | <b>Reference</b> |
|------------|-------------------------------------------------------|-----------------------------------------|------------------|
| 1          | Li <sub>3</sub> HoBr <sub>6</sub>                     | 1.1                                     | 1                |
| 2          | Li <sub>2.73</sub> Ho <sub>1.09</sub> Cl <sub>6</sub> | 1.3                                     | 2                |
| 3          | Li <sub>3</sub> HoCl <sub>6</sub>                     | 0.29                                    | 2                |
| 4          | Li <sub>2.73</sub> Dy <sub>1.09</sub> Cl <sub>6</sub> | 0.9                                     | 2                |
| 5          | Li <sub>2.73</sub> Y <sub>1.09</sub> Cl <sub>6</sub>  | 0.7                                     | 2                |
| 6          | Li <sub>2.73</sub> Er <sub>1.09</sub> Cl <sub>6</sub> | 0.64                                    | 2                |
| 7          | Li <sub>2.73</sub> Tm <sub>1.09</sub> Cl <sub>6</sub> | 0.89                                    | 2                |
| 8          | Li <sub>3</sub> TiCl <sub>6</sub>                     | 1.04                                    | 3                |
| 9          | Li <sub>3</sub> InCl <sub>6</sub>                     | 1.49                                    | 4                |
| 10         | Li <sub>3</sub> ScCl <sub>6</sub>                     | 3.02                                    | 5                |
| 11         | LiScCl <sub>4</sub>                                   | 0.123                                   | 5                |
| 12         | Li <sub>1.5</sub> ScCl <sub>4.5</sub>                 | 0.243                                   | 5                |
| 13         | Li <sub>2</sub> ScCl <sub>5</sub>                     | 0.624                                   | 5                |
| 14         | Li <sub>2.5</sub> ScCl <sub>5.5</sub>                 | 2.57                                    | 5                |
| 15         | Li <sub>3.5</sub> ScCl <sub>6.5</sub>                 | 2.42                                    | 5                |
| 16         | Li <sub>4</sub> ScCl <sub>7</sub>                     | 1.98                                    | 5                |

|    |                                                       |       |    |
|----|-------------------------------------------------------|-------|----|
| 17 | LiAlCl <sub>4</sub>                                   | 0.001 | 6  |
| 18 | Li <sub>2</sub> ZrCl <sub>6</sub>                     | 0.81  | 6  |
| 19 | Li <sub>3</sub> YCl <sub>6</sub>                      | 0.51  | 7  |
| 20 | Li <sub>3</sub> ErCl <sub>6</sub>                     | 0.087 | 7  |
| 21 | Li <sub>3</sub> YBr <sub>6</sub>                      | 0.72  | 8  |
| 22 | Li <sub>1.52</sub> Mn <sub>1.24</sub> Cl <sub>4</sub> | 0.015 | 9  |
| 23 | Li <sub>1.6</sub> Mg <sub>1.2</sub> Cl <sub>4</sub>   | 0.035 | 9  |
| 24 | Li <sub>2</sub> Sc <sub>2/3</sub> Cl <sub>4</sub>     | 1.5   | 10 |
| 25 | Li <sub>3</sub> YbCl <sub>6</sub>                     | 0.19  | 11 |
| 26 | Li <sub>2.61</sub> Y <sub>1.13</sub> Cl <sub>6</sub>  | 0.38  | 12 |
| 27 | Li <sub>3</sub> ScBr <sub>6</sub>                     | 1.4   | 13 |
| 28 | Li <sub>3</sub> ErI <sub>6</sub>                      | 0.65  | 14 |
| 29 | LiAlF <sub>4</sub>                                    | 0.001 | 15 |
| 30 | Li <sub>2.7</sub> AlF <sub>5.4</sub>                  | 0.075 | 16 |
| 31 | Li <sub>3</sub> InBr <sub>6</sub>                     | 1     | 17 |
| 32 | LiGaBr <sub>4</sub>                                   | 0.007 | 18 |
| 33 | Li <sub>2</sub> VCl <sub>4</sub>                      | 0.006 | 19 |
| 34 | Li <sub>2</sub> MnCl <sub>4</sub>                     | 0.004 | 19 |
| 35 | Li <sub>1.6</sub> Fe <sub>1.2</sub> Cl <sub>4</sub>   | 0.013 | 20 |

|           |                                                                  |         |    |
|-----------|------------------------------------------------------------------|---------|----|
| <b>36</b> | $\text{Li}_3\text{FeCl}_6$                                       | 0.13    | 21 |
| <b>37</b> | $\text{Li}_6\text{FeCl}_8$                                       | 0.22    | 22 |
| <b>38</b> | $\text{Li}_6\text{CoCl}_8$                                       | 0.062   | 22 |
| <b>39</b> | $\text{Li}_3\text{TbCl}_6$                                       | 0.2     | 23 |
| <b>40</b> | $\text{Li}_3\text{DyCl}_6$                                       | 0.1     | 23 |
| <b>41</b> | $\text{Li}_3\text{TmCl}_6$                                       | 0.1     | 23 |
| <b>42</b> | $\text{Li}_3\text{YI}_6$                                         | 0.1     | 24 |
| <b>43</b> | $\text{Li}_3\text{GaF}_6$                                        | 0.088   | 25 |
| <b>44</b> | $\text{Li}_{2.65}\text{YCl}_{5.65}$                              | 0.205   | 26 |
| <b>45</b> | $\text{Li}_{2.83}\text{Y}_{1.06}\text{Cl}_6$                     | 0.57    | 27 |
| <b>46</b> | $\text{Li}_{2.727}\text{Y}_{1.091}\text{Cl}_6$                   | 0.69    | 27 |
| <b>47</b> | $\text{Li}_3\text{LaI}_6$                                        | 0.96    | 28 |
| <b>48</b> | $\text{Li}_3\text{TbBr}_6$                                       | 1.7     | 29 |
| <b>49</b> | $\text{Li}_{1.4}\text{MgCl}_{3.4}$                               | 0.00869 | 30 |
| <b>50</b> | $\text{Li}_4\text{YI}_7$                                         | 1.04    | 31 |
| <b>51</b> | $\text{Li}_{2.7}\text{In}_{0.7}\text{Hf}_{0.3}\text{Cl}_6$       | 1.28    | 32 |
| <b>52</b> | $\text{Li}_{2.5}\text{Y}_{0.5}\text{Zr}_{0.5}\text{Cl}_6$        | 1.4     | 33 |
| <b>53</b> | $\text{Li}_{2.633}\text{Er}_{0.633}\text{Zr}_{0.367}\text{Cl}_6$ | 1.1     | 33 |
| <b>54</b> | $\text{Li}_{2.9}\text{Er}_{0.9}\text{Zr}_{0.1}\text{Cl}_6$       | 0.36    | 33 |

|    |                                                                |      |    |
|----|----------------------------------------------------------------|------|----|
| 55 | $\text{Li}_{2.8}\text{Er}_{0.8}\text{Zr}_{0.2}\text{Cl}_6$     | 0.77 | 33 |
| 56 | $\text{Li}_{2.25}\text{Zr}_{0.75}\text{Fe}_{0.25}\text{Cl}_6$  | 0.98 | 34 |
| 57 | $\text{Li}_{2.6}\text{Yb}_{0.6}\text{Hf}_{0.4}\text{Cl}_6$     | 1.5  | 35 |
| 58 | $\text{Li}_{2.8}\text{Yb}_{0.8}\text{Zr}_{0.2}\text{Cl}_6$     | 1.2  | 35 |
| 59 | $\text{Li}_{2.7}\text{Zr}_{0.3}\text{In}_{0.7}\text{Cl}_6$     | 2.1  | 36 |
| 60 | $\text{Li}_3\text{Y}(\text{Br}_3\text{Cl}_3)$                  | 1.6  | 37 |
| 61 | $\text{Li}_3\text{HoBr}_3\text{I}_3$                           | 2.7  | 38 |
| 62 | $\text{Li}_3\text{YBr}_{5.7}\text{F}_{0.3}$                    | 1.8  | 39 |
| 63 | $13\text{Li}_3\text{InCl}_{4.8}\text{F}_{1.2}$                 | 0.51 | 40 |
| 64 | $\text{Li}_{2.7}\text{In}_{0.4}\text{Hf}_{0.6}\text{Cl}_6$     | 0.71 | 40 |
| 65 | $\text{Li}_{2.7}\text{In}_{0.3}\text{Hf}_{0.7}\text{Cl}_6$     | 0.31 | 40 |
| 66 | $\text{Li}_{2.9}\text{In}_{0.9}\text{Hf}_{0.1}\text{Cl}_6$     | 0.97 | 40 |
| 67 | $\text{Li}_{2.8}\text{In}_{0.8}\text{Hf}_{0.2}\text{Cl}_6$     | 1.05 | 40 |
| 68 | $\text{Li}_{2.5}\text{Er}_{0.5}\text{Zr}_{0.5}\text{Cl}_6$     | 0.9  | 41 |
| 69 | $\text{Li}_{2.5}\text{Sc}_{0.5}\text{Zr}_{0.5}\text{Cl}_6$     | 2.23 | 42 |
| 70 | $20\text{Li}_{2.1}\text{Zr}_{0.95}\text{Mg}_{0.05}\text{Cl}_6$ | 0.67 | 43 |
| 71 | $\text{Li}_{2.6}\text{In}_{0.6}\text{Zr}_{0.4}\text{Cl}_6$     | 1.25 | 44 |
| 72 | $\text{Li}_2\text{In}_{1/3}\text{Sc}_{1/3}\text{Cl}_4$         | 2    | 45 |
| 73 | $\text{Li}_3\text{Ho}_{0.6}\text{In}_{0.4}\text{Cl}_6$         | 2.5  | 46 |

|           |                                                                  |       |    |
|-----------|------------------------------------------------------------------|-------|----|
| <b>74</b> | $\text{Li}_2\text{ZrCl}_{5.2}\text{F}_{0.8}$                     | 0.2   | 47 |
| <b>75</b> | $\text{Li}_{2.375}\text{Sc}_{0.375}\text{Zr}_{0.625}\text{Cl}_6$ | 2.2   | 48 |
| <b>76</b> | $\text{Li}_{2.375}\text{Sc}_{0.375}\text{Hf}_{0.625}\text{Cl}_6$ | 1.1   | 48 |
| <b>77</b> | $\text{Li}_2\text{ZrCl}_{5.6}\text{F}_{0.4}$                     | 0.321 | 49 |
| <b>78</b> | $\text{Li}_3\text{YCl}_5\text{F}$                                | 0.22  | 50 |
| <b>79</b> | $29\text{Li}_{2.6}\text{Sc}_{0.6}\text{Zr}_{0.4}\text{Cl}_6$     | 1.61  | 51 |
| <b>80</b> | $\text{Li}_{2.556}\text{Yb}_{0.492}\text{Zr}_{0.492}\text{Cl}_6$ | 1.58  | 52 |
| <b>81</b> | $\text{Li}_{2.9}\text{In}_{0.9}\text{Zr}_{0.1}\text{Cl}_6$       | 1.54  | 53 |
| <b>82</b> | $\text{Li}_3\text{YBr}_2\text{Cl}_4$                             | 1.27  | 54 |
| <b>83</b> | $\text{Li}_3\text{AlF}_{5.87}\text{Cl}_{0.13}$                   | 0.2   | 55 |
| <b>84</b> | $\text{Li}_{2.8}\text{Zr}_{0.2}\text{In}_{0.8}\text{Cl}_6$       | 1.39  | 56 |
| <b>85</b> | $\text{Li}_{1.7}\text{Zr}_{0.7}\text{Ta}_{0.3}\text{Cl}_6$       | 1.42  | 57 |
| <b>86</b> | $\text{Li}_4\text{YBr}_{3.5}\text{I}_{3.5}$                      | 1.5   | 58 |
| <b>87</b> | $\text{Li}_3\text{HoBr}_{3.1}\text{I}_{2.9}$                     | 2.7   | 59 |

Table S2 Pairwise Spearman rank correlation coefficients between XGBoost and other top-performing models (GBR, RF, and DT).

| Dataset         | Model Pair     | Spearman $\rho$ |
|-----------------|----------------|-----------------|
| Ternary Halides | XGBoost vs GBR | 0.9348          |
|                 | XGBoost vs RF  | 0.8681          |
|                 | XGBoost vs DT  | 0.8430          |
|                 | Mean           | 0.8820          |

|                    |                |        |
|--------------------|----------------|--------|
| Quaternary Halides | XGBoost vs GBR | 0.9541 |
|                    | XGBoost vs RF  | 0.9736 |
|                    | XGBoost vs DT  | 0.8579 |
|                    | Mean           | 0.9285 |

Note: A higher  $\rho$  value indicates better ranking consistency between models. All Spearman correlation coefficients exceed 0.84, indicating strong consistency in material rankings across different ML models. This stability supports the reliability of XGBoost as the core model for mechanistic interpretation and the identification of promising halide candidates.

Note S1. Detailed discussion of candidates in Tables S3 and S4

This note provides additional details on the promising SSEs identified in Tables S3 and S4.

1. Previously unreported candidates. Many of these candidates have not been previously reported as SSEs, which represents targets for future experimental validation. Representative examples are ternary compounds such as  $\text{CsLiBr}_2$ ,  $\text{CsLi}_2\text{Br}_3$ , and  $\text{CsLi}_3\text{Br}_4$  (predicted  $\sigma_{\text{RT}} \approx 2.23$  mS/cm), and quaternary compounds such as  $\text{Rb}_2\text{LiTaBr}_6$  (2.40 mS/cm),  $\text{Cs}_2\text{LiTaBr}_6$  (2.31 mS/cm) and  $\text{LiRb}_2\text{MoBr}_6$  (2.28 mS/cm).

2. Model consistency and resolution limits. Among the top ternary candidates, several Cs-Li-Br compounds share nearly identical predicted conductivities ( $\approx 2.23$  mS/cm) and similarly low IonicRad\_Mis values ( $< 0.09$  Å). This reflects the model's internal consistency, as compounds with analogous descriptor values are predicted to exhibit comparable performance. As an initial screening tool, the model is not designed to resolve fine-grained differences among such closely related compositions. These candidates are therefore prioritized for subsequent experimental validation and structure-dependent analyses, which will determine the optimal stoichiometry for SSEs.

3. External validation for  $\text{CsLi}_2\text{Cl}_3$ . Among these candidates,  $\text{CsLi}_2\text{Cl}_3$  has been studied by AIMD simulations, which report a room-temperature ionic conductivity of 4.5 mS/cm (US Patent App. 2025/0140906 A1). The agreement confirms the predictive

capability of our approach.

Table S3. Representative ternary halide systems identified by the ML model, showing predicted  $\sigma_{RT}$  and corresponding key descriptors (i.e. ionic radius mismatch and van der Waals mismatch).

| MP ID      | Formula                                         | IonicRad_Mis<br>(Å) | VdWRad_Mis<br>(Å) | Predicted $\sigma_{RT}$<br>(mS/cm) |
|------------|-------------------------------------------------|---------------------|-------------------|------------------------------------|
| mp-23057   | CsLiBr <sub>2</sub>                             | 0.068938766         | 0.130568221       | 2.226537                           |
| mp-571409  | Cs <sub>2</sub> Li <sub>3</sub> Br <sub>5</sub> | 0.074347975         | 0.131154689       | 2.226537                           |
| mp-606680  | CsLi <sub>2</sub> Br <sub>3</sub>               | 0.078175446         | 0.130416212       | 2.226537                           |
| mp-580554  | CsLi <sub>3</sub> Br <sub>4</sub>               | 0.083256432         | 0.127153108       | 2.226537                           |
| mp-1080005 | Cs <sub>3</sub> Li <sub>2</sub> Br <sub>5</sub> | 0.063858571         | 0.128874283       | 2.1507561                          |
| mp-1189357 | Cs <sub>3</sub> LiBr <sub>4</sub>               | 0.056709937         | 0.125393637       | 2.1507561                          |
| mp-1095674 | Cs <sub>2</sub> LiBr <sub>3</sub>               | 0.060620879         | 0.127416142       | 2.150756                           |
| mp-1120734 | Cs <sub>3</sub> LiCl <sub>4</sub>               | 0.041812848         | 0.113042506       | 2.1237724                          |
| mp-28243   | RbLiCl <sub>2</sub>                             | 0.082141484         | 0.129157631       | 2.1237724                          |
| mp-7594    | CsLiF <sub>2</sub>                              | 0.068021152         | 0.137326821       | 2.1237723                          |
| mp-559766  | Cs <sub>3</sub> LiF <sub>4</sub>                | 0.043914271         | 0.117713424       | 2.1237723                          |
| mp-558728  | Cs <sub>3</sub> Li <sub>2</sub> F <sub>5</sub>  | 0.057804265         | 0.128528569       | 2.1237723                          |
| mp-553988  | Cs <sub>2</sub> LiF <sub>3</sub>                | 0.051497258         | 0.123416029       | 2.1237723                          |
| mp-23364   | CsLiCl <sub>2</sub>                             | 0.063009036         | 0.126522366       | 2.1237723                          |
| mp-571390  | Cs <sub>2</sub> LiCl <sub>3</sub>               | 0.048608623         | 0.117211738       | 2.1237723                          |
| mp-570756  | Cs <sub>3</sub> Li <sub>2</sub> Cl <sub>5</sub> | 0.054177837         | 0.120783511       | 2.1237723                          |
| mp-606604  | CsLi <sub>2</sub> F <sub>3</sub>                | 0.088719638         | 0.155981033       | 2.0587742                          |
| mp-555439  | CsLi <sub>3</sub> F <sub>4</sub>                | 0.102102998         | 0.167617478       | 2.0587742                          |
| mp-560088  | Cs <sub>2</sub> Li <sub>3</sub> F <sub>5</sub>  | 0.079697703         | 0.147824          | 2.0587742                          |
| mp-7593    | RbLiF <sub>2</sub>                              | 0.088467569         | 0.151864102       | 2.0587742                          |
| mp-569117  | CsLi <sub>2</sub> Cl <sub>3</sub>               | 0.080048028         | 0.136586896       | 2.0587742                          |
| mp-571666  | CsLi <sub>3</sub> Cl <sub>4</sub>               | 0.090380206         | 0.140838786       | 2.0587742                          |
| mp-28237   | RbLiBr <sub>2</sub>                             | 0.087300247         | 0.120649031       | 1.961933                           |

Table S4. Representative quaternary halide systems identified by the ML model, showing predicted  $\sigma_{RT}$  and corresponding major descriptors (i.e. IonicRad\_Mis and Pol\_m/n).

| MP ID      | Formula                             | IonicRad_Mis (Å) | Pol_m/n     | Predicted $\sigma_{RT}$<br>(mS/cm) |
|------------|-------------------------------------|------------------|-------------|------------------------------------|
| mp-1110707 | Rb <sub>2</sub> LiTaBr <sub>6</sub> | 0.162072229      | 26.57142857 | 2.4023396                          |
| mp-1111834 | Cs <sub>2</sub> LiTaBr <sub>6</sub> | 0.150188636      | 30.42857143 | 2.3136315                          |
| mp-1110711 | Rb <sub>2</sub> LiMoBr <sub>6</sub> | 0.12858525       | 27.19047619 | 2.2804255                          |
| mp-1206187 | Rb <sub>2</sub> LiRhCl <sub>6</sub> | 0.161123863      | 37.67123288 | 2.2325229                          |
| mp-1206553 | Rb <sub>2</sub> LiRuCl <sub>6</sub> | 0.156926753      | 38.08219178 | 2.2325229                          |
| mp-1110680 | Rb <sub>2</sub> LiSbCl <sub>6</sub> | 0.144708558      | 36.09589041 | 2.2325229                          |
| mp-1110708 | Rb <sub>2</sub> LiSbBr <sub>6</sub> | 0.132131932      | 25.0952381  | 2.1992716                          |
| mp-1110706 | Rb <sub>2</sub> LiYBr <sub>6</sub>  | 0.106667077      | 30.76190476 | 2.1592814                          |
| mp-1111835 | Cs <sub>2</sub> LiSbBr <sub>6</sub> | 0.120768942      | 28.95238095 | 2.1177573                          |
| mp-1110668 | Rb <sub>2</sub> LiMoCl <sub>6</sub> | 0.143888012      | 39.10958904 | 2.0853662                          |
| mp-989405  | Cs <sub>2</sub> LiInBr <sub>6</sub> | 0.114161609      | 30          | 2.0290501                          |
| mp-1111847 | Cs <sub>2</sub> LiMoBr <sub>6</sub> | 0.116897729      | 31.04761905 | 2.0290501                          |
| mp-567628  | Rb <sub>2</sub> LiDyBr <sub>6</sub> | 0.12807629       | 30.90476191 | 2.0290501                          |
| mp-1111833 | Cs <sub>2</sub> LiYBr <sub>6</sub>  | 0.095674145      | 34.61904762 | 2.0290501                          |
| mp-1110746 | Rb <sub>2</sub> LiSbI <sub>6</sub>  | 0.129313479      | 16.01823708 | 1.992416                           |
| mp-1113000 | Cs <sub>2</sub> LiTaI <sub>6</sub>  | 0.146695149      | 19.4224924  | 1.9277602                          |
| mp-1110745 | Rb <sub>2</sub> LiTaI <sub>6</sub>  | 0.155533461      | 16.96048632 | 1.8972519                          |
| mp-        | Rb <sub>2</sub> LiMoI <sub>6</sub>  | 0.124536763      | 17.3556231  | 1.8020976                          |

|            |                                     |             |             |           |
|------------|-------------------------------------|-------------|-------------|-----------|
| 1110749    |                                     |             |             |           |
| mp-989583  | Rb <sub>2</sub> LiInCl <sub>6</sub> | 0.135898917 | 37.60273973 | 1.7325861 |
| mp-1112836 | Cs <sub>2</sub> LiMoI <sub>6</sub>  | 0.116492526 | 19.81762918 | 1.6431778 |
| mp-1112673 | Cs <sub>2</sub> LiSbI <sub>6</sub>  | 0.121189539 | 18.48024316 | 1.6431778 |
| mp-1112663 | Cs <sub>2</sub> LiYI <sub>6</sub>   | 0.100903921 | 22.09726444 | 1.6431778 |
| mp-1111439 | Cs <sub>2</sub> LiSbCl <sub>6</sub> | 0.13209266  | 41.64383562 | 1.5502586 |
| mp-1206399 | Rb <sub>2</sub> LiVCl <sub>6</sub>  | 0.155654403 | 39.10958904 | 1.1124629 |
| mp-1113928 | Rb <sub>2</sub> LiScCl <sub>6</sub> | 0.105451333 | 39.79452055 | 0.8715433 |

## References

- 1 X. Shi, Z. Zeng, M. Sun, B. Huang, H. Zhang, W. Luo, Y. Huang, Y. Du and C. Yan, *Nano Lett.*, 2021, **21**, 9325–9331.
- 2 J. Liang, E. Van Der Maas, J. Luo, X. Li, N. Chen, K. R. Adair, W. Li, J. Li, Y. Hu, J. Liu, L. Zhang, S. Zhao, S. Lu, J. Wang, H. Huang, W. Zhao, S. Parnell, R. I. Smith, S. Ganapathy, M. Wagemaker and X. Sun, *Adv. Energy Mater.*, 2022, **12**, 2103921.
- 3 K. Wang, Z. Gu, Z. Xi, L. Hu and C. Ma, *Nat. Commun.*, 2023, **14**, 1396.
- 4 X. Li, J. Liang, J. Luo, M. Norouzi Banis, C. Wang, W. Li, S. Deng, C. Yu, F. Zhao, Y. Hu, T.-K. Sham, L. Zhang, S. Zhao, S. Lu, H. Huang, R. Li, K. R. Adair and X. Sun, *Energy Environ. Sci.*, 2019, **12**, 2665–2671.
- 5 J. Liang, X. Li, S. Wang, K. R. Adair, W. Li, Y. Zhao, C. Wang, Y. Hu, L. Zhang, S. Zhao, S. Lu, H. Huang, R. Li, Y. Mo and X. Sun, *J. Am. Chem. Soc.*, 2020, **142**, 7012–7022.
- 6 H. Wu, H. Han, Z. Yan, Q. Zhao and J. Chen, *J. Solid State Electrochem.*, 2022, **26**, 1791–1808.
- 7 R. Schlem, S. Muy, N. Prinz, A. Banik, Y. Shao-Horn, M. Zobel and W. G. Zeier, *Adv. Energy Mater.*, 2020, **10**, 1903719.
- 8 T. Asano, A. Sakai, S. Ouchi, M. Sakaida, A. Miyazaki and S. Hasegawa, *Adv. Mater.*, 2018, **30**, 1803075.
- 9 R. Kanno, Y. Takeda, K. Takada and O. Yamamoto, *J. Electrochem. Soc.*, 1984, **131**, 469–474.
- 10 L. Zhou, C. Y. Kwok, A. Shyamsunder, Q. Zhang, X. Wu and L. F. Nazar, *Energy Environ. Sci.*, 2020, **13**, 2056–2063.
- 11 J. Park, D. Han, H. Kwak, Y. Han, Y. J. Choi, K.-W. Nam and Y. S. Jung, *Chem. Eng. J.*,

- 2021, **425**, 130630.
- 12 S. Yang, S. Y. Kim and G. Chen, *ACS Energy Lett.*, 2024, **9**, 2212–2221.
- 13 M. Jiang, Z.-W. Chen, A. Rao, L.-X. Chen, P. Adeli, P. Mercier, Y. Abu-Lebdeh and C. V. Singh, *J. Mater. Chem. C*, 2024, **12**, 4885–4896.
- 14 R. Schlem, T. Bernges, C. Li, M. A. Kraft, N. Minafra and W. G. Zeier, *ACS Appl. Energy Mater.*, 2020, **3**, 3684–3691.
- 15 T. Oi and K. Miyauchi, .
- 16 Y. Lee, D. M. Piper, A. S. Cavanagh, M. J. Young, S.-H. Lee and S. M. George, .
- 17 Y. Tomita, H. Matsushita, Y. Maeda, K. Kobayashi and K. Yamada, *Defect Diffus. Forum*, 2005, **242–244**, 17–26.
- 18 Y. Tomita, *Solid State Ion.*, 2000, **136–137**, 351–355.
- 19 C. Cros, L. Hanebali and L. Lati, .
- 20 R. Kanno, Y. Takeda, K. Takada and O. Yamamoto, *Solid State Ion.*, 1983, **9–10**, 153–156.
- 21 K. Tuo, F. Yin and C. Sun, *ACS Sustain. Chem. Eng.*, 2024, **12**, 7012–7025.
- 22 L. Huang, L. Zhang, J. Bi, T. Liu, Y. Zhang, C. Liu, J. Cui, Y. Su, B. Wu and F. Wu, *Energy Mater. Adv.*, 2024, **4**, 0092.
- 23 K. Tuo, C. Sun and S. Liu, *Electrochem. Energy Rev.*, 2023, **6**, 17.
- 24 Z. Xu, X. Chen, K. Liu, R. Chen, X. Zeng and H. Zhu, *Chem. Mater.*, 2019, **31**, 7425–7433.
- 25 X. Nie, J. Hu and C. Li, *Interdiscip. Mater.*, 2023, **2**, 365–389.
- 26 L. Hu, J. Zhu, C. Duan, J. Zhu, J. Wang, K. Wang, Z. Gu, Z. Xi, J. Hao, Y. Chen, J. Ma, J.-X. Liu and C. Ma, *Cell Rep. Phys. Sci.*, 2023, **4**, 101428.
- 27 X. Li, J. T. Kim, J. Luo, C. Zhao, Y. Xu, T. Mei, R. Li, J. Liang and X. Sun, *Nat. Commun.*, 2024, **15**, 53.
- 28 Z. Xu, X. Chen, K. Liu, R. Chen, X. Zeng and H. Zhu, *Chem. Mater.*, 2019, **31**, 7425–7433.
- 29 Z. Zeng, X. Shi, M. Sun, H. Zhang, W. Luo, Y. Huang, B. Huang, Y. Du and C.-H. Yan, *Nano Res.*, 2023, **16**, 9344–9351.
- 30 R. Kanno, Y. Takeda, O. Yamamoto, C. Cros, W. Gang and P. Hagen’Muller, .
- 31 S. Zhang, F. Zhao, H. Su, Y. Zhong, J. Liang, J. Chen, M. L. Zheng, J. Liu, L. Chang, J. Fu, S. H. Alahakoon, Y. Hu, Y. Liu, Y. Huang, J. Tu, T. Sham and X. Sun, *Angew. Chem. Int. Ed.*, 2024, **63**, e202316360.
- 32 H. Wang, Y. Li, Y. Tang, D. Ye, T. He, H. Zhao and J. Zhang, *ACS Appl. Mater. Interfaces*, 2023, **15**, 5504–5511.
- 33 K.-H. Park, K. Kaup, A. Assoud, Q. Zhang, X. Wu and L. F. Nazar, *ACS Energy Lett.*, 2020, **5**, 533–539.
- 34 H. Kwak, D. Han, J. Lyoo, J. Park, S. H. Jung, Y. Han, G. Kwon, H. Kim, S. Hong, K. Nam and Y. S. Jung, *Adv. Energy Mater.*, 2021, **11**, 2003190.
- 35 J. Park, D. Han, H. Kwak, Y. Han, Y. J. Choi, K.-W. Nam and Y. S. Jung, *Chem. Eng. J.*, 2021, **425**, 130630.
- 36 H. Kwak, D. Han, J. P. Son, J. S. Kim, J. Park, K.-W. Nam, H. Kim and Y. S. Jung, *Chem. Eng. J.*, 2022, **437**, 135413.
- 37 T. Jeon and S. C. Jung, *J. Mater. Chem. A*, 2023, **11**, 4334–4344.

- 38 M. A. Plass, S. Bette, R. E. Dinnebier and B. V. Lotsch, *Chem. Mater.*, 2022, **34**, 3227–3235.
- 39 T. Yu, J. Liang, L. Luo, L. Wang, F. Zhao, G. Xu, X. Bai, R. Yang, S. Zhao, J. Wang, J. Yu and X. Sun, *Adv. Energy Mater.*, 2021, **11**, 2101915.
- 40 H. Wang, Y. Li, Y. Tang, D. Ye, T. He, H. Zhao and J. Zhang, *ACS Appl. Mater. Interfaces*, 2023, **15**, 5504–5511.
- 41 K.-H. Park, K. Kaup, A. Assoud, Q. Zhang, X. Wu and L. F. Nazar, *ACS Energy Lett.*, 2020, **5**, 533–539.
- 42 W. Li, Z. Chen, Y. Chen, W. Duan, G. Liu, Y. Lv, H. Yang and L. Yao, *Chem. Eng. J.*, 2023, **455**, 140509.
- 43 H. Zhang, Z. Yu, H. Chen, Y. Zhou, X. Huang and B. Tian, *J. Energy Chem.*, 2023, **79**, 348–356.
- 44 H. Kwak, D. Han, J. P. Son, J. S. Kim, J. Park, K.-W. Nam, H. Kim and Y. S. Jung, *Chem. Eng. J.*, 2022, **437**, 135413.
- 45 X. Nie, J. Hu and C. Li, *Interdiscip. Mater.*, 2023, **2**, 365–389.
- 46 X. Li, J. T. Kim, J. Luo, C. Zhao, Y. Xu, T. Mei, R. Li, J. Liang and X. Sun, *Nat. Commun.*, 2024, **15**, 53.
- 47 X. Luo, X. He, H. Su, Y. Zhong, X. Wang and J. Tu, *Chem. Eng. J.*, 2023, **465**, 143036.
- 48 R. Li, P. Lu, X. Liang, L. Liu, M. Avdeev, Z. Deng, S. Li, K. Xu, J. Feng, R. Si, F. Wu, Z. Zhang and Y.-S. Hu, *ACS Energy Lett.*, 2024, **9**, 1043–1052.
- 49 W. Tang, W. Xia, F. Hussain, J. Zhu, S. Han, W. Yin, P. Yu, J. Lei, D. S. Butenko, L. Wang and Y. Zhao, *J. Power Sources*, 2023, **568**, 232992.
- 50 S. Kim, Y. Lee, K. Kim, B. C. Wood, S. S. Han and S. Yu, *ACS Energy Lett.*, 2024, **9**, 38–47.
- 51 H. Zhang, Z. Zeng, X. Shi, C. Wang and Y. Du, *EcoMat*, 2023, **5**, e12315.
- 52 G. Xu, L. Luo, J. Liang, S. Zhao, R. Yang, C. Wang, T. Yu, L. Wang, W. Xiao, J. Wang, J. Yu and X. Sun, *Nano Energy*, 2022, **92**, 106674.
- 53 H. Kwak, D. Han, J. P. Son, J. S. Kim, J. Park, K.-W. Nam, H. Kim and Y. S. Jung, *Chem. Eng. J.*, 2022, **437**, 135413.
- 54 E. Van Der Maas, W. Zhao, Z. Cheng, T. Famprakis, M. Thijs, S. R. Parnell, S. Ganapathy and M. Wagemaker, *J. Phys. Chem. C*, 2023, **127**, 125–132.
- 55 J. Hu, M. Lei, C. Zhu, B. Zhang and C. Li, *Adv. Funct. Mater.*, 2024, **34**, 2314044.
- 56 H. Kwak, D. Han, J. P. Son, J. S. Kim, J. Park, K.-W. Nam, H. Kim and Y. S. Jung, *Chem. Eng. J.*, 2022, **437**, 135413.
- 57 C. Fu, Y. Li, W. Xu, X. Feng, W. Gu, J. Liu, W. Deng, W. Wang, A. M. M. Abeykoon, L. Su, L. Zhu, X. Wu and H. Xiang, *Nat. Commun.*, 2024, **15**, 4315.
- 58 S. Zhang, F. Zhao, H. Su, Y. Zhong, J. Liang, J. Chen, M. L. Zheng, J. Liu, L. Chang, J. Fu, S. H. Alahakoon, Y. Hu, Y. Liu, Y. Huang, J. Tu, T. Sham and X. Sun, *Angew. Chem. Int. Ed.*, 2024, **63**, e202316360.
- 59 M. A. Plass, S. Bette, R. E. Dinnebier and B. V. Lotsch, *Chem. Mater.*, 2022, **34**, 3227–3235.
